# Supplementary material for: Physicochemical, Antioxidant, and Sensory Characteristics of Sponge Cake Fortified with Quinoa Flour, Oolong, and White Tea Powder
Source: Hindawi journal article supplement (doi:10.1155/2024/6086158), 2024-03-26
Supplement: f1 [file 6086158.f1.docx]

|  |  |  |
| --- | --- | --- |
|  |  |  |
|  |  |  |
|  |  |  |

**Figure S1.** 3D surface plots for the effect of variables on pH of sponge cake samples on (a) day 0, (b) day 7, (c) day 14 and (d) day 21 of storage. (OT: Oolong tea powder; WT: White tea powder; QF: Quinoa flour**)**

(d)

(c)

(b)

(a)

|  |  |  |
| --- | --- | --- |
|  |  |  |
|  |  |  |
|  |  |  |

**Figure S2.** 3D surface plots for the effect of variables on peroxide value of sponge cake samples (a) day 0, (b) day 7, (c) day 14 and (d) day 21 of storage. (OT: Oolong tea powder; WT: White tea powder; QF: Quinoa flour**)**

(d)

(c)

(b)

(a)

|  |  |  |
| --- | --- | --- |
|  |  |  |
|  |  |  |
|  |  |  |

**Figure S3.** 3D surface plots for the effect of variables on the L* of sponge cake samples crust (a) day 0, (b) day 7, (c) day 14 and (d) day 21 of storage. (OT: Oolong tea powder; WT: White tea powder; QF: Quinoa flour**)**

(d)

(c)

(b)

(a)

|  |  |  |
| --- | --- | --- |
|  |  |  |
|  |  |  |
|  |  |  |

**Figure S4.** 3D surface plots for the effect of variables on a* of sponge cake samples crust (a) day 0, (b) day 7, (c) day 14 and (d) day 21 of storage.

(d)

(c)

(b)

(a)

|  |  |  |
| --- | --- | --- |
|  |  |  |
|  |  |  |
|  |  |  |

**Figure S5.** 3D surface plots for the effect of variables on the overall acceptability of sponge cake samples on (a) day 0, (b) day 7, (c) day 14 and (d) day 21 of storage. (OT: Oolong tea powder; WT: White tea powder; QF: Quinoa flour**)**

(d)

(c)

(b)

(a)

(d)

(c)

(b)

(a)
